# Supplementary material for: pH-Responsive Aerobic Nanoparticles for Effective Photodynamic Therapy
Source: PubMed Central journal article supplement — Theranostics. 2017 Oct 13;7(18):4537–50. doi: 10.7150/thno.19546 (PMC5695147; doi:10.7150/thno.19546), 2017-10-13
Supplement: thnov07p4537s1.pdf [file thnov07p4537s1.pdf]

## Supporting Information

# pH-Responsive Aerobic Nanoparticles for Effective Photodynamic Therapy

Lingyue Shen<sup>1</sup>, Yu Huang<sup>2</sup>, Dong Chen<sup>2</sup>, Feng Qiu<sup>3</sup>, Chuan Ma<sup>1</sup>, Xin Jin<sup>1</sup>, Xinyuan Zhu<sup>2,✉</sup>,  
Guoyu Zhou<sup>1,✉</sup>, and Zhiyuan Zhang<sup>1,✉</sup>

<sup>1</sup> Department of Oral & Maxillofacial-Head & Neck Oncology, Shanghai Key Laboratory of Stomatology, Cosmetic Laser Center, Ninth People's Hospital, Shanghai Jiao Tong University School of Medicine, Shanghai 200011, P. R. China.

<sup>2</sup> School of Chemistry and Chemical Engineering, Shanghai Key Lab of Electrical Insulation and Thermal Aging, Shanghai Jiao Tong University, 800 Dongchuan Road, Shanghai, 200240, P. R. China.

<sup>3</sup> School of Chemical and Environmental Engineering, Shanghai Institute of Technology, 100 Haiquan Road, Shanghai 201418, P. R. China.

✉ Corresponding authors: Xinyuan Zhu, Ph.D., School of Chemistry and Chemical Engineering, Shanghai Key Lab of Electrical Insulation and Thermal Aging, Shanghai Jiao Tong University, 800 Dongchuan Road, Shanghai, 200240, P. R. China. Guoyu Zhou, Ph.D., and Zhiyuan Zhang, Ph.D., Department of Oral & Maxillofacial-Head Neck Oncology, Ninth People's Hospital, Shanghai Jiao Tong University School of Medicine, Shanghai 200011, P. R. China. E-mail: xyzhu@sjtu.edu.cn, guoyuzhou@hotmail.com, zhzy0502@163.com

## 1. Supplementary Figures and tables

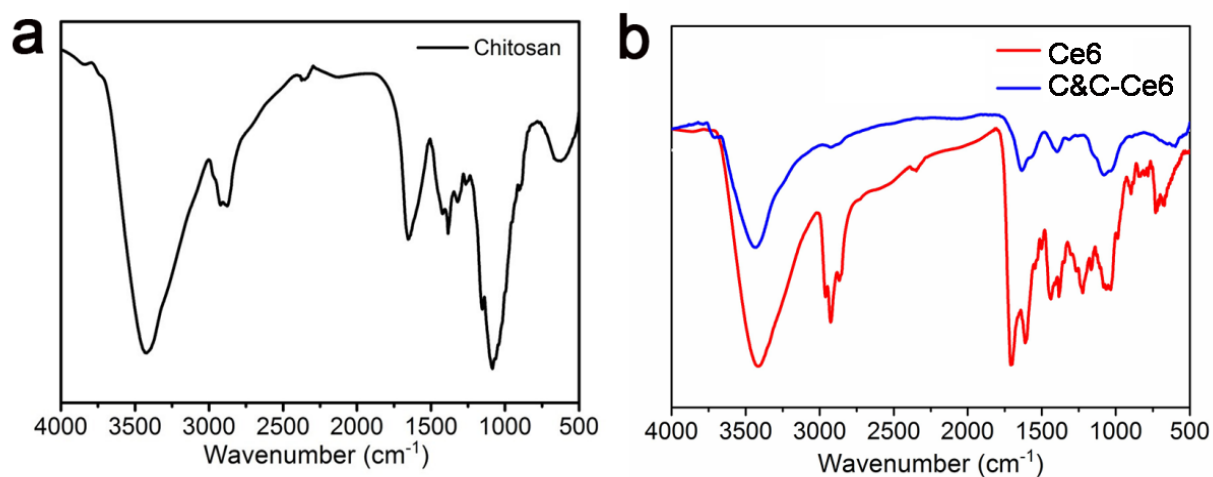

**Figure S1.** The FTIR absorption spectra of Chitosan (a), Ce6 and C&C-Ce6 nanoparticles (b).

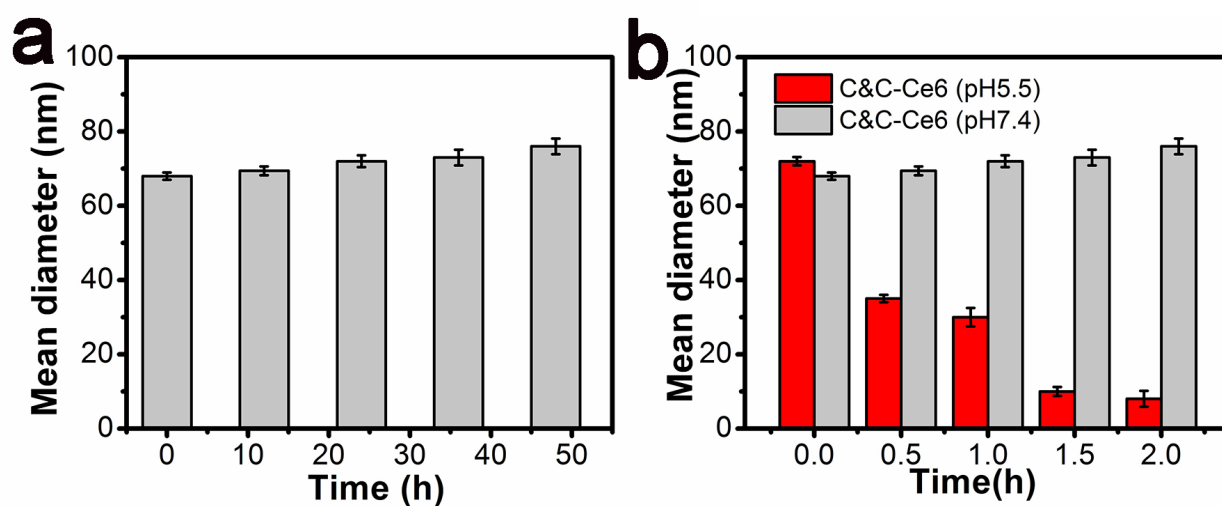

**Figure S2.** (a) The time-dependent DLS results of C&C-Ce6 nanoparticles under pH 7.4 at 37 °C; (b) the stability of C&C-Ce6 nanoparticles under different pH values (7.4 & 5.5).

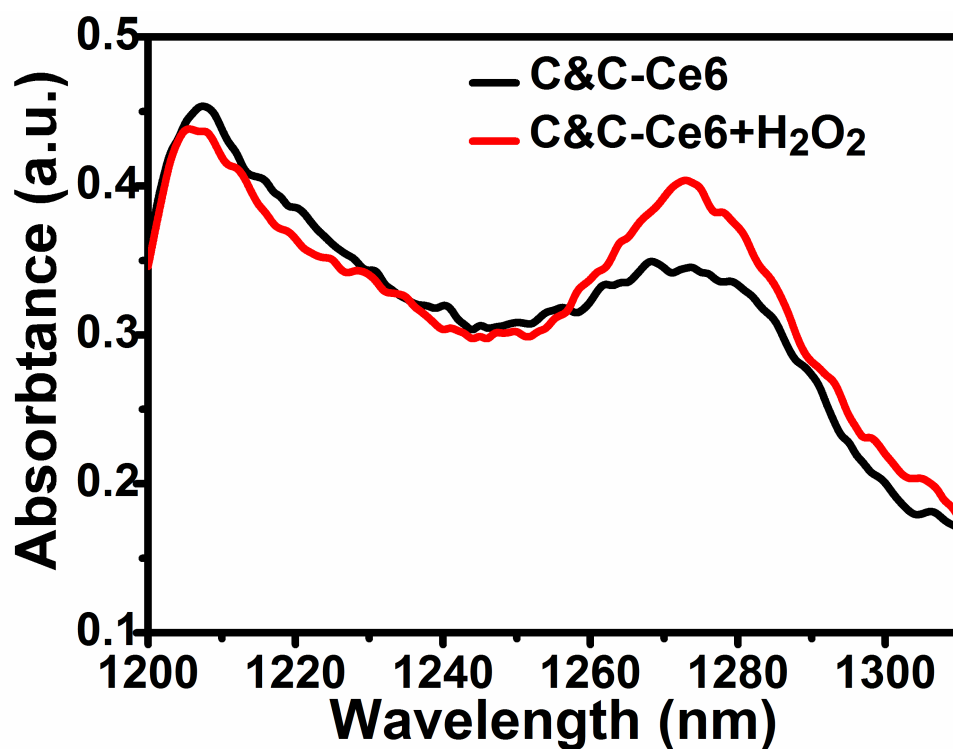

**Figure S3.** The  $^1\text{O}_2$  phosphorescence spectra of C&C-Ce6 and C&C-Ce6+H<sub>2</sub>O<sub>2</sub> upon the excitation at 650 nm in the neutral medium.

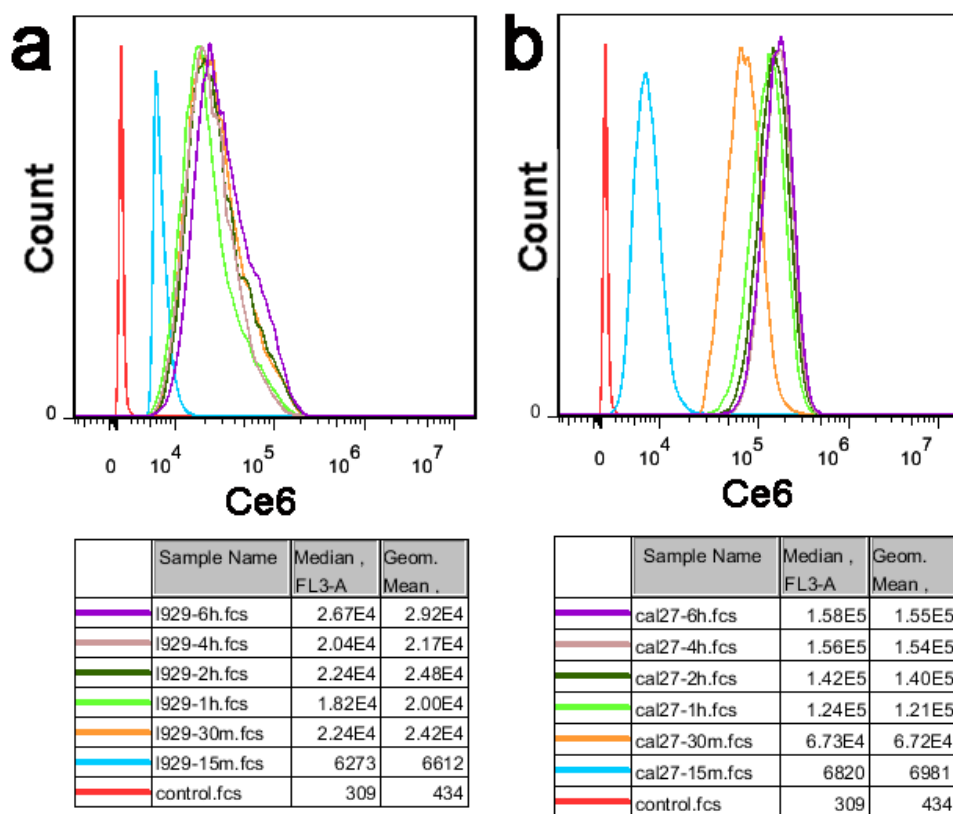

**Figure S4.** CAL-27 cells uptake (a) and L929 cells uptake (b) of C&C-Ce6 nanoparticles.

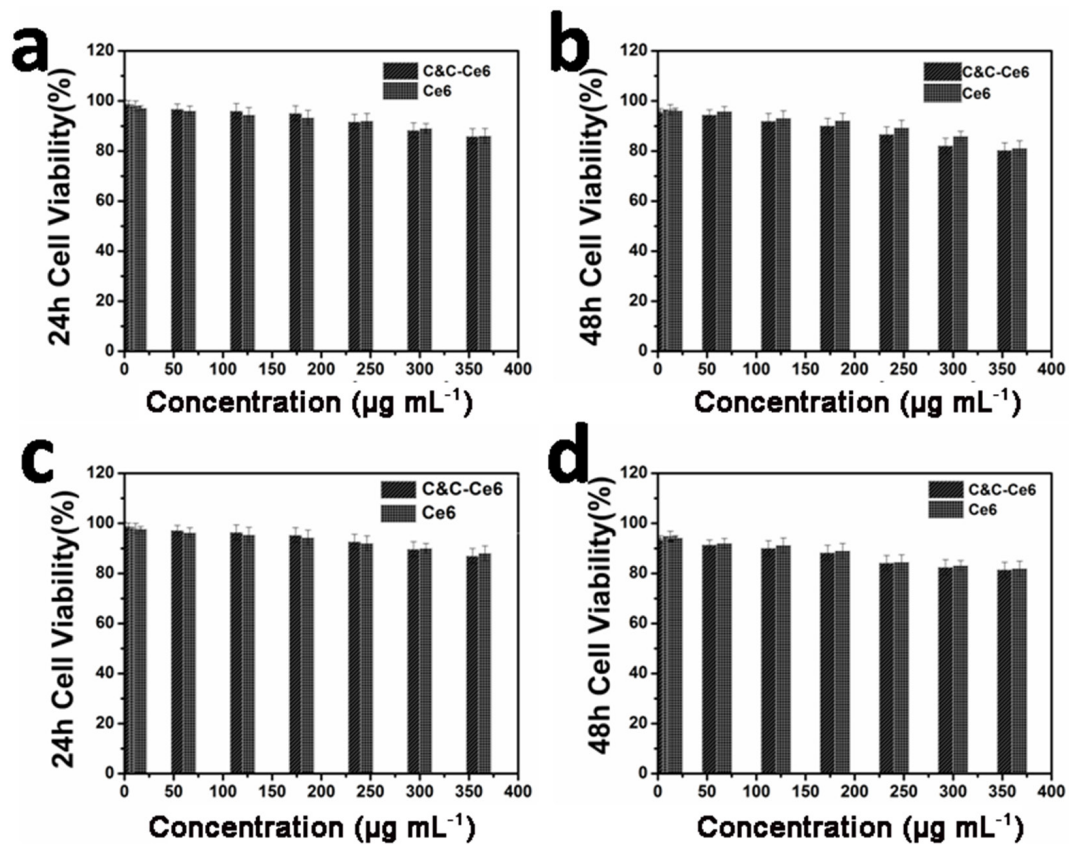

**Figure S5.** the 24h viabilities of CAL27 cells (a) and L929 cells (b) incubation of free Ce6 and C&C-Ce6 nanoparticles with different concentration of Ce6; the 48h viabilities of CAL27 cells (c) and L929 cells (d) incubation of free Ce6 and C&C-Ce6 nanoparticles with different concentration of Ce6.

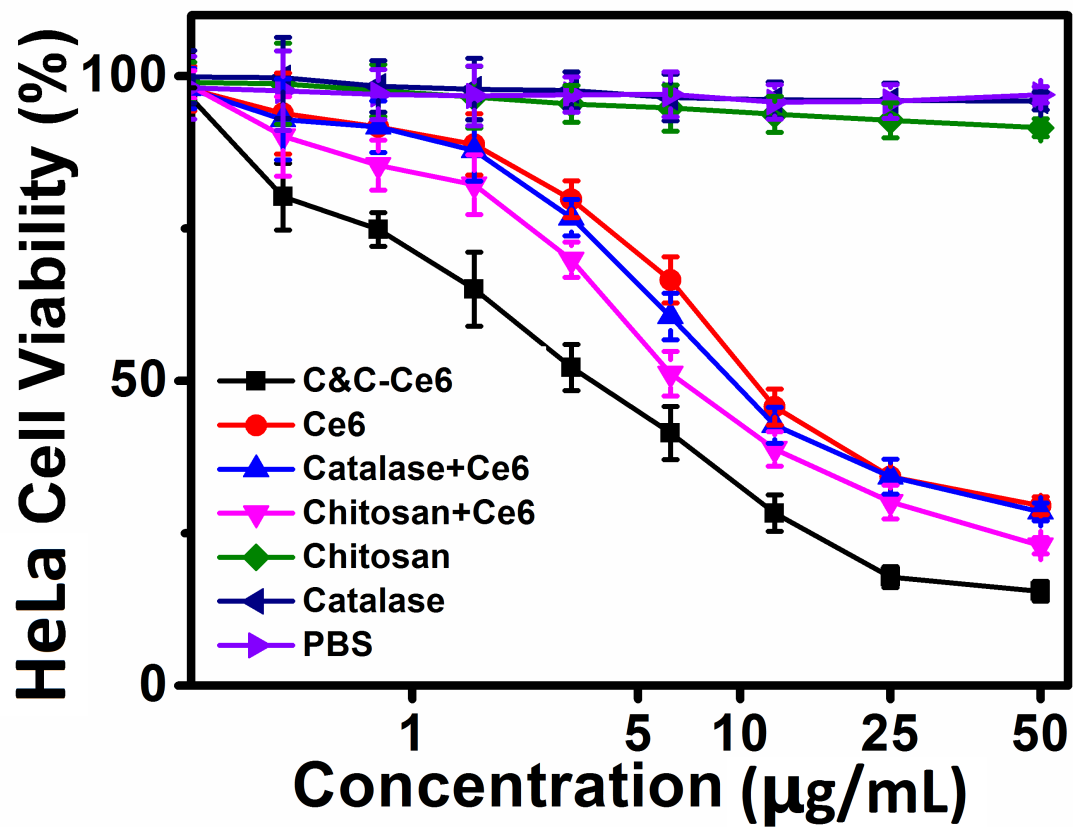

**Figure S6.** Cell viability of HeLa cells after C&C-Ce6, free Ce6, Catalase+Ce6 mixture, Chitosan+Ce6 nanoparticles, free Chitosan, free Catalase and PBS mediated PDT cultured for 24 h after photo-irradiation. (with different reagents Ce6 concentration at the Ce6 concentration of 1 to 50  $\mu\text{g mL}^{-1}$ )

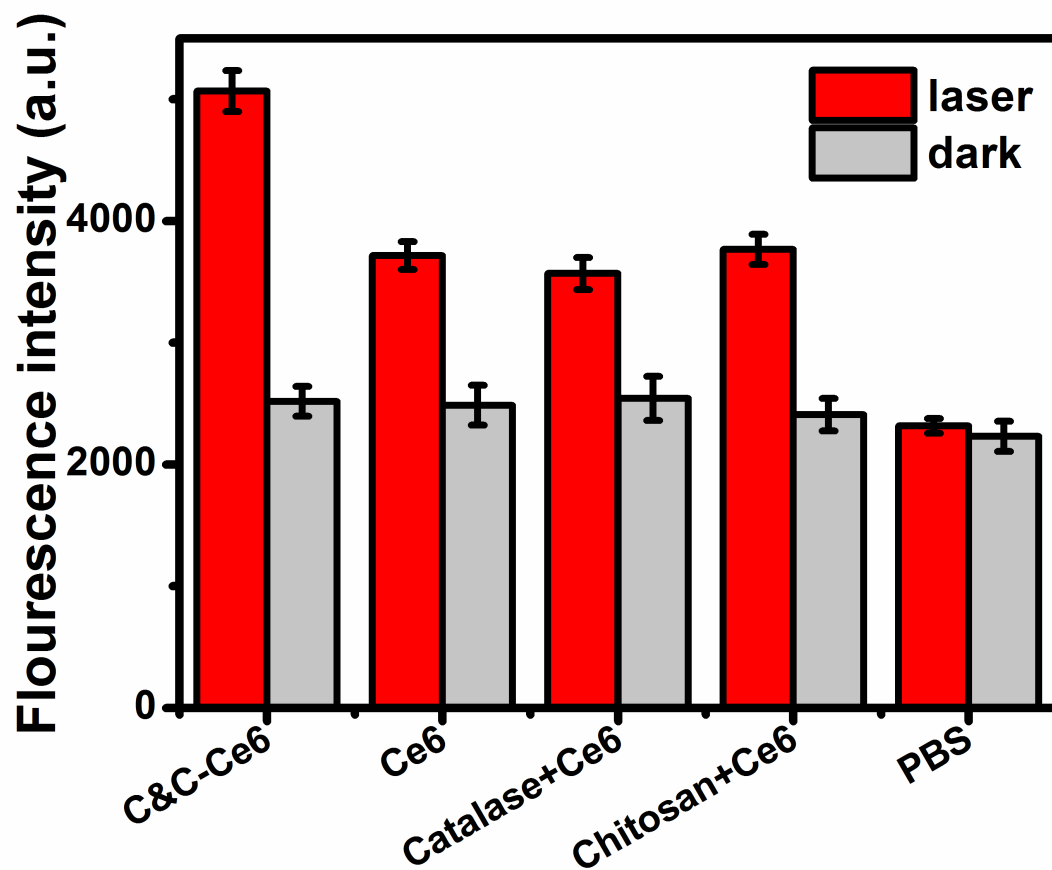

**Figure S7.** ROS fluorescence intensity of C&C-Ce6, free Ce6, Catalase+Ce6 mixture, Chitosan+Ce6 nanoparticles and PBS mediated PDT in CAL-27 cells.

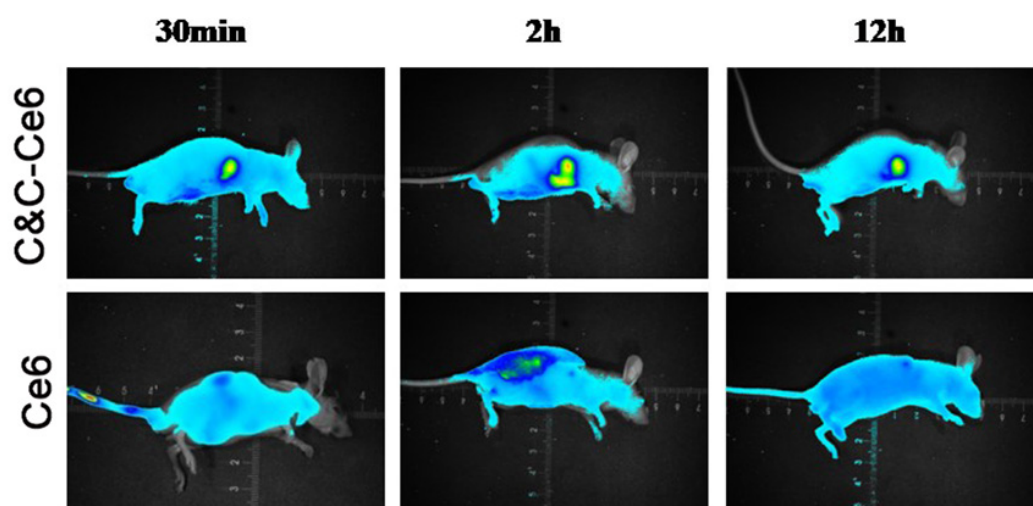

**Figure S8.** Fluorescence intensity of tumor-burdened mice pretreated with C&C-Ce6 and Ce6, respectively, after intravenously injection of 30 min, 2 h, 12 h.

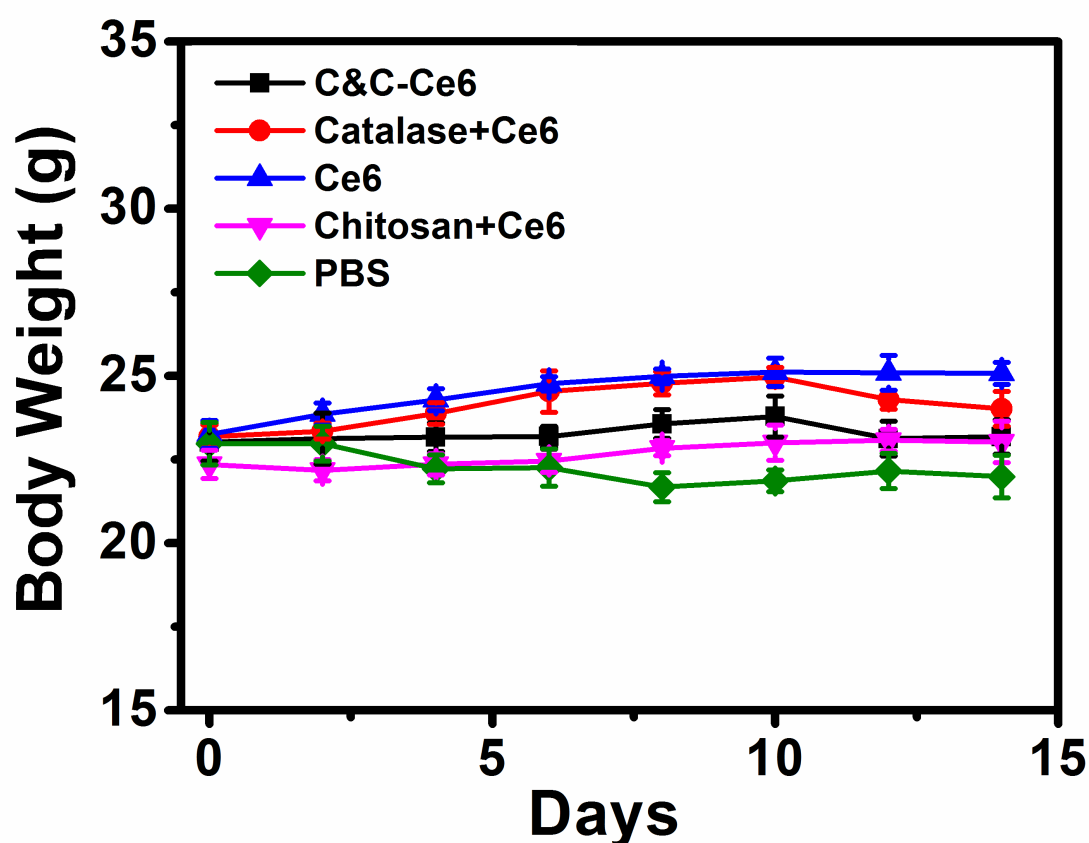

**Figure S9.** Body weight changes of tumor-bearing mice pretreated with PBS, Chitosan+Ce6 nanoparticles, Catalase+Ce6 mixture, free Ce6 and C&C-Ce6 nanoparticles, respectively, for 14 days after PDT
